# 1 Clownfishes are a genetic model of 2 exceptional longevity and reveal molecular 3 convergence in the evolution of lifespan

---

4 Arne Sahn<sup>1</sup>, Pedro Almada-Pagan<sup>2</sup>, Martin Bens<sup>1</sup>, Mirko Mutalipassi<sup>3</sup>, Alejandro Lucas-Sanchez<sup>2</sup>, Jorge  
5 de Costa Ruiz<sup>2</sup>, Matthias Görlach<sup>1</sup>, Alessandro Cellerino<sup>1,4</sup>

6 1 Leibniz Institute on Aging, Fritz Lipmann Institute, Jena Germany

7 2 Dept. de Fisiologia, Universidad de Murcia

8 3 Stazione Zoologica Anton Dohrn, Napoli, Italy

9 4 Bio@SNS, Scuola Normale Superiore, Pisa, Italy

## 10 Abstract

11 Standard evolutionary theories of aging postulate that reduced extrinsic mortality leads to evolution of  
12 longevity. Clownfishes of the genus *Amphiprion* live in a symbiotic relationship with sea anemones that  
13 provide protection from predation. We performed a survey and identified at least two species with  
14 lifespan of over 20 years. Given their small size and ease of captive reproduction, clownfishes lend  
15 themselves as experimental models of exceptional longevity.

16 To identify genetic correlates of exceptional longevity, we sequenced the transcriptomes of *Amphiprion*  
17 *percula* and *A. clarkii* and performed a scan for positively-selected genes (PSGs). These were compared  
18 with PSGs detected in long-lived mole rats and short-lived killifishes revealing convergent evolution in  
19 processes such as mitochondrial biogenesis. Among individual genes, the Mitochondrial Transcription  
20 Termination Factor 1 (*MTERF1*), was positively-selected in all three clades, whereas the Glutathione S-

21    Transferase Kappa 1 (*GSTK1*) was under positive selection in two independent clades.. For the latter,  
22    homology modelling strongly suggested that positive selection targeted enzymatically important  
23    residues.

24    These results indicate that specific pathways were recruited in independent lineages evolving an  
25    exceptionally extended or shortened lifespan and point to mito-nuclear balance as a key factor.

## 26    **Keywords**

27    Amphiprion, positive selection, evolution of lifespan, life-history trait, mitonuclear balance

## 28    **Introduction**

29    The lifespan of vertebrate species spans two orders of magnitude from few months for annual killifish  
30    (1) to several centuries for the greenland shark (2). Understanding the genetic architecture underlying  
31    these differences is a major challenge but may deliver new insights into the mechanisms controlling  
32    evolution of lifespan and human longevity.

33    Next-generation sequencing technology has revolutionized evolutionary genomics as it allows to obtain  
34    genome-scale sequence information for large number of species. A particularly useful approach to  
35    identify the genetic architecture of evolutionary novelties is the analysis of positive selection. This  
36    approach requires the comparison of the sequence of protein-coding genes in related clades where one  
37    of the clades evolved the trait of interest, in this specific case exceptional lifespan. To date, several  
38    different mammalian taxa/clades where analysed with this approach with the purpose of identifying  
39    sequence changes associated to evolution of longevity: the elephant, the bowhead whale, bats and  
40    mole-rats (3-8). These analyses delivered interesting candidate genes and pathways that underwent  
41    accelerated molecular evolution in coincidence with evolution of exceptional lifespan. A major drawback

42 of this approach is that these long-living mammals are difficult or impossible to be kept in captivity and  
43 manipulated experimentally. This creates the need for a long-lived vertebrate that is small in size, easily  
44 adaptable to captive life, can be bred in large numbers and therefore represents a convenient  
45 experimental model organism.

46 Standard evolutionary theories of aging predict that low extrinsic mortality conditions lead to the  
47 evolution of slow senescence and increased lifespan. Some examples that confirm these theories are the  
48 exceptional longevity of vertebrate species under low predation risk since they are chemically protected  
49 (9, 10), adapted to an arboreal life (11) or found in protected environments such as caves, respectively.

50 On the other hand, annual fishes of the genus *Nothobranchius* provide an example of how increased  
51 extrinsic mortality conditions lead to the evolution of accelerated senescence and short lifespan (12-14).

52 Analysis of positive selection in annual killifishes revealed a potential link between the evolution of  
53 genes governing mitochondrial biogenesis and the evolution of lifespan (15).

54 All clownfish species (genus *Amphiprion*) evolved a specific adaptation that allows them to live in  
55 symbiosis with sea anemones. Symbiosis evolved in the last common ancestor of clownfish and  
56 clownfish represent a monophyletic group in the Pomacentridae family (damsel-fishes) (16). In the Indo-  
57 Pacific Ocean, clownfishes are found in association with one or more sea anemone species and a large  
58 variation in host usage exists (17-19). Fish that feel threatened by predators immediately seek  
59 protection by the anemone's tentacles; without that symbiosis, fishes are readily attacked and predated  
60 (20-22). Therefore, clownfish are protected from predation through reduction of extrinsic mortality  
61 owing to the presence of anemones (23). Hence, the overall mortality rate of clownfish is low as  
62 compared to other coral reef fishes or other tropical species of Pomacentridae of the same size (20, 23-  
63 26).

64 All clownfish are born as males and develop, through protandrous hermaphroditism, into females: in a  
65 colony, only the dominant pair contributes to the reproduction of the colony (27). Other individuals of  
66 the colony are non-breeding males. Studies in the wild have shown that natural mortality of adult  
67 clownfishes can be very low: during the period 2011–2013, the average biannual mortality rate *per*  
68 *capita* varied, depending on the study site, between 0.18 and 0.49 for juveniles, 0.09 and 0.44 for males,  
69 and 0.19 and 0.55 for females (28). Predatory pressure differs in different stages of adulthood and is  
70 increased for non-breeding males (20).

71 These fishes are small in size (less than 10 cm for the smallest species) and the closely-related species *A.*  
72 *percula* and *A. ocellaris* are popular and hardy aquarium fishes, are bred in large numbers for the  
73 aquarium trade, and are subject to selective breeding to fix specific pigmentation patterns so that a  
74 number of different captive strains are available. For these reasons, clownfishes could become the first  
75 experimental model for long-living vertebrates.

76 In order to identify the genetic basis of adaptations linked to clownfishes' exceptional lifespans, we  
77 performed a positive selection analysis. This analysis requires the identification of the closest related  
78 taxon that does not possess the trait of interest in order to exclude events of positive selection that  
79 predate the evolution of this trait (29).

80 Other species of damselfish evolved an inter-specific mutualistic relationship with branching corals (30,  
81 31). In this case, corals are used by fishes as shelter that can provide protection from predators and a  
82 safe area to egg laying (32, 33). Among the family Pomacentridae, *Chromis viridis* shows an interesting  
83 relationship with a wide range of scleractinians (34, 35). Despite the presence of favourable  
84 microhabitat, *C. viridis* are predated by a wide range of generalist predator species. Hixon and Carr (36)  
85 suggested there is a clear relationship among transient and benthic predators and damselfish mortality:  
86 damselfish that search for protection in the shelter from transient predators are susceptible to attack by

87 resident benthic predators and vice versa. In the presence of both groups of predators, mortality  
88 increases dramatically due to the lack of available refuge that expose *Chromis* to intense predation (36).  
89 Therefore, *Chromis viridis* represent a well-suited outgroup for our analysis because it shares with  
90 clownfishes several general traits linked to benthic life and symbiosis with corals but it is subject to  
91 much higher predation rates (Fig. 1).

## 92 Captive lifespan of clownfishes

93 In order to obtain a reliable lower estimate for the captive lifespan of clownfish species, in 2016 we  
94 distributed a questionnaire to researchers working with clownfishes and to public aquaria across Europe  
95 (Table 1/S1), and surveyed existing literature. For six different species, at least one individual was  
96 reported to have lived more than 10 years and for two different species, *A. melanopus* and *A. ocellaris*,  
97 we obtained record of animals alive and actively spawning at an age of over 20 years. More systematic  
98 data could be obtained for the species *A. ocellaris* (the most common species in the aquarium trade).  
99 The oldest cohort for which a record was available comprised 27 fish born in 2008 of which 25 were still  
100 alive in 2016.

101 We conclude that there is solid evidence that at least the species *A. ocellaris* and *A. clarkii* can live in  
102 captivity for more than two decades making them the first teleost model of exceptional longevity.

103 **Table 1.** Results of the clownfish survey. The longest-lived individual for each species is indicated

| Species                               | oldest animal | status at census | size of group |
|---------------------------------------|---------------|------------------|---------------|
| <i>A. akydinos</i>                    | 13            | dead             | 1             |
| <i>A. clarkii</i> (wild)*             | 12            | alive            | n.a.          |
| <i>A. clarkii</i> (privately owned)   | 16            | alive            | 2/0 dead      |
| <i>A. clarkii</i>                     | 9             | alive            | 2/0 dead      |
| <i>A. frenatus</i> **                 | 18            | dead             | n.a.          |
| <i>A. melanopus</i>                   | 21            | alive            | 2/0 dead      |
| <i>A. ocellaris</i> (privately owned) | 22            | alive            | 2/0 dead      |
| <i>A. ocellaris</i>                   | 17            | alive            | 2/0 dead      |

|                          |    |       |      |
|--------------------------|----|-------|------|
| <i>A. perideraion</i> ** | 18 | alive | n.a. |
|--------------------------|----|-------|------|

104 \* Moyer, 1986 (37)

105 \*\* Fautin and Allen, 1992 (17)

## 106 Analysis of positive selection

107 In order to perform genome-wide scans for positive selection, we obtained the transcriptomes of the  
108 species *A. clarkii* and *A. percula* based on own sequencing using methods previously described for the  
109 killifishes (15). Furthermore, we assembled clownfish transcriptomes from public read data of *A.*  
110 *bicinctus*, *A. ocellaris* and *A. sebae*. As the closest-related non-symbiotic species, we additionally  
111 sequenced the transcriptome of *Chromis viridis*, a very abundant species in coral reefs. More distant  
112 outgroups were a selection of species from the series Ovalentaria, whose genomes are available in  
113 GenBank (see also (15)). We analysed positive selection on the branch leading to the last common  
114 ancestor (LCA) of all clownfish species (Fig. 1).

115 A total of 157 positively selected genes (PSGs) of 14214 analyzed genes were identified in the LCA of the  
116 clownfishes (Table S2). We tested for overrepresentation of gene ontology (GO, FDR <0.1) and observed  
117 19 biological processes enriched for PSGs (Table 2, Table S3). A majority of these processes is of  
118 particular interest for aging research: altogether nine enriched processes are linked to the metabolism  
119 of xenobiotics, detoxification or glutathione metabolism, respectively. Interestingly, these processes  
120 were shown to be strongly up-regulated in experimental conditions favoring longevity such as dietary  
121 restriction and inhibition of the somatotropic axis making the animals more resistant to toxins (38-41).  
122 Furthermore, experimental manipulation of mitochondrial translation, another enriched process, is  
123 known to increase lifespan in *C. elegans* (42).

124 **Table 2.** Biological gene ontology processes enriched for positively selected genes (FDR<0.1).

| GOBPID* | Term | FDR** |
|---------|------|-------|
|---------|------|-------|

|            |                                                                             |          |
|------------|-----------------------------------------------------------------------------|----------|
| GO:1901685 | glutathione derivative metabolic process                                    | 0.020646 |
| GO:1901687 | glutathione derivative biosynthetic process                                 | 0.020646 |
| GO:0006805 | xenobiotic metabolic process                                                | 0.08376  |
| GO:0032543 | mitochondrial translation                                                   | 0.08376  |
| GO:0071466 | cellular response to xenobiotic stimulus                                    | 0.08376  |
| GO:0009410 | response to xenobiotic stimulus                                             | 0.08376  |
| GO:0042178 | xenobiotic catabolic process                                                | 0.08376  |
| GO:0007157 | heterophilic cell-cell adhesion via plasma membrane cell adhesion molecules | 0.08376  |
| GO:0050900 | leukocyte migration                                                         | 0.08376  |
| GO:0045321 | leukocyte activation                                                        | 0.08376  |
| GO:0007155 | cell adhesion                                                               | 0.08376  |
| GO:0022610 | biological adhesion                                                         | 0.08376  |
| GO:0048870 | cell motility                                                               | 0.08376  |
| GO:0051674 | localization of cell                                                        | 0.08376  |
| GO:1990748 | cellular detoxification                                                     | 0.08376  |
| GO:0055081 | anion homeostasis                                                           | 0.08376  |
| GO:0007229 | integrin-mediated signaling pathway                                         | 0.085657 |
| GO:0016477 | cell migration                                                              | 0.085657 |
| GO:0098754 | detoxification                                                              | 0.085657 |

125 \* GOBPID – gene ontology biological process ID

126 \* FDR – false discovery rate (adjusted p-value for multiple testing)

127 Furthermore, mitochondrial translation was one of the mitochondrial biogenesis processes that were  
128 found to be enriched for PSGs in extremely short-lived killifishes (15). Recent observations of similar  
129 genes and pathways found to be affected by positive selection, both, in very long- and short-lived  
130 species led to hypotheses of antiparallel evolution (43, 44). This means that functionally opposite  
131 selection pressures with regard to the tradeoff between fast growth and a long lifespan can result in  
132 adaptations of the same genes and pathways – in opposite functional directions. We further tested this  
133 hypothesis by using Fisher’s method to combine enrichment p-values across the results of the recent  
134 positive selection analyses in short-lived killifishes and the analysis in clownfishes. In this meta-analysis,  
135 34 genes exhibited a signature of positive selection (FDR<0.1) across species (Tables S4-S6).

136 **Table 3.** Positively selected genes associated with mitochondrial biogenesis identified in a meta-analysis  
137 across three evolutionary clades with exceptional short or long lifespans.

| Gene symbol | p-value        |                          |            |             | FDR****  |
|-------------|----------------|--------------------------|------------|-------------|----------|
|             | Clownfish LCA* | <i>Nothobranchius</i> ** | Mole-rat** | Combined*** |          |
| MTERF1      | 7.34E-03       | 1.25E-03                 | 2.57E-02   | 3.12E-05    | 4.01E-04 |
| RARS2       | 1.82E-03       | 1.18E-02                 | NA*****    | 2.52E-04    | 2.43E-03 |
| MRPL30      | 2.55E-02       | 1.00E+00                 | 9.59E-03   | 2.28E-03    | 7.98E-03 |
| FASTKD2     | 1.77E-04       | 1.56E-01                 | 1.00E+00   | 3.16E-04    | 2.43E-03 |
| FASTKD5     | NA*****        | 1.39E-03                 | 8.25E-01   | 8.89E-03    | 2.44E-02 |
| TFB2M       | NA*****        | 4.34E-04                 | 6.91E-01   | 2.73E-03    | 9.15E-03 |
| NDUFA9      | NA*****        | 8.31E-02                 | 6.90E-03   | 4.85E-03    | 1.56E-02 |

138 \* LCA – last common ancestors  
 139 \*\* These p-values resulted from meta-analysis using Fisher’s method of 3 ancestral *Nothobranchius* and  
 140 11 examined mole-rat branches on which lifespan changed considerably  
 141 \*\*\* This p-value results from a meta-analysis of the three p-values in the left columns using Fisher’s  
 142 method  
 143 \*\*\*\* FDR – false discovery rate (adjusted p-value for multiple testing)  
 144 \*\*\*\*\* NA – no p-value calculated since the gene could not be tested in the respective context

145 An overrepresentation analysis of GO terms among the genes yielded signatures of positive selection in  
 146 the meta-analysis across different species with exceptional lifespans. As in our previous examination of  
 147 short-lived killifishes (15), we found an enrichment for mitochondrial biogenesis functions ( $p=1.05 \times 10^{-5}$ ,  
 148 Table S7). Among the genes involved in mitochondrial biogenesis were *TFB2M* and *MTERF*, that are  
 149 necessary for mitochondrial transcription, *FASTKD5* and *FASTKD2* whose gene products are required for  
 150 the biogenesis of mitochondrial ribosomes, (45), as well as *RARS2* coding for a mitochondrial tRNA-  
 151 synthetase.

152 Among the other 15 PSGs genes showing evidence for positive selection, both, in the clownfish LCA and  
 153 in meta-analysis were, e.g., *LAMP2* and *CD63* (also called *LAMP3*) which code for major protein  
 154 components of the lysosomal membrane (46, 47). In addition, *CD63* gene expression was shown to  
 155 predict the malignancy grade of many different tumor types (48-52) and the artificial prevention of the  
 156 decrease of *LAMP2* gene expression during aging in mice results in considerably reduced cell damage, as  
 157 well as in liver functions in old mice that are indistinguishable from those in young mice (53). Finally,  
 158 another interesting example that was identified as significant, both, in the clownfish LCA and in the



159 meta-analysis, is *GSTK1* encoding a glutathione-S-transferase that localizes to the peroxisome. *GSTK1*  
160 was shown to be associated with diabetes type 2 which is another major aging related disease (54, 55).  
161 The positive selection analysis provides not only candidate genes but also candidate amino acids for  
162 follow-up studies. To exemplify this, we performed protein homology modeling for *GSTK1* starting from  
163 the publicly available structures of the human dimeric apoenzyme (PDB 3RPP, (56)) and the rat dimeric  
164 enzyme with the bound GSH substrate (PDB 1R4W; (57)). The latter was used to assess on a structural  
165 basis the relationship of the six positively selected sites in the clownfish with those that are known to be  
166 involved in the enzyme's function (57). Interestingly, also the LCA of *Nothobranchius* shows positive  
167 selection in *GSTK1* contains, in addition, one site with high probability of positive selection in the LCA of  
168 *Nothobranchius* (Glu167, blue in Fig.2). The selected site in *Nothobranchius*, however, is structurally  
169 remote to the functionally relevant sites. In contrast, we found that in clownfish two of three sites that  
170 were predicted with high probability to be positively selected ( $\geq 95\%$ , Phe60, Met63, red in Fig.2) and  
171 one of three sites with lower probability (41%, His64, orange in Fig.2) belong to the same  $\alpha$ -helical  
172 stretch of amino acids that lines the substrate access channel, contribute to the dimer interface (Asn61,  
173 Tyr65, Asp69, green in Fig. 2) as well as to the substrate binding sites (Lys62, turquoise in Fig. 2),  
174 respectively (57). The third site with a high probability to be positively selected is Glu88 (brown in Fig 2).  
175 Glu88 is one of four amino acids at the entrance of the substrate access channel and situated in close  
176 proximity to Pro55, Pro56 and Pro87 (black in Fig. 2). The latter three are also part of the substrate  
177 access channel (57). We found another site positively selected with a lower probability in close proximity  
178 to the dimer interface (Lys177, orange in Fig. 2). This positive selection at particular positions related to  
179 enzymatic function invites the speculation that it might have a bearing on the enzymatic activity of the  
180 clownfish *GSTK1*, but this hypothesis would have to be tested experimentally.

## 181 Conclusions

182 We have provided evidence for exceptional longevity of clownfishes in captivity. The species *A. ocellaris*  
183 is bred in captivity and commercially available in large numbers and we suggest this species as  
184 laboratory model for extended lifespan.

185 Analysis of positive selection has shown evolutionary convergence both with the exceptionally short-  
186 lived genus *Nothobranchius* and with exceptionally-long lived mole rats.

187 In particular, clownfishes and mole rats both show positive selection in two key proteins of the  
188 lysosome: LAMP2 and CD63. These results are consistent with the conserved up-regulation across  
189 tissues and species of genes coding for lysosomal proteins and widespread accumulation of lysosomal  
190 aggregates observed during aging (58, 59) and suggests that lysosomal function is of key importance for  
191 evolution of exceptional longevity. Another interesting example of convergent evolution is GSTK1, which  
192 is positively selected in both the exceptionally-long and exceptionally-short lived fish clades. GSTK1 is  
193 involved in glutathione metabolism. Since detailed structures of this protein are available (56, 57),  
194 homology modelling was possible and it strongly suggests that positive selection targeted positions that  
195 are involved in the enzymatic function of the encoded protein.

196 Finally, prominent signs of convergence were observed for genes and pathways related to biogenesis of  
197 mitochondrially-encoded proteins with the remarkable observation that MTERF is under positive  
198 selection in all three taxa. These findings point to the key importance of mito-nuclear balance in the  
199 regulation of animal longevity.

## 200 Methods

### 201 Clownfish lifespan estimation

202 The determination of clownfish lifespan was performed through the distribution of an internet-based  
203 questionnaire to zoos and aquariums worldwide, requesting information on clownfish demographic  
204 details: (1) the various clownfish species maintained in captivity, (2) the number of individuals for each  
205 species, (3) if each individual is captive bred or not, (4) the year of acquisition and, if not still alive,  
206 death, and (5) the sex of each individual, if determined. The questionnaire was circulated in 2016 to  
207 international associations and organizations of zoos and public aquariums such as the European  
208 Association of Zoos and Aquaria (EAZA), the Association of Zoos and Aquariums (AZA), the European  
209 Union of Aquarium Curators (EUAC) and the World Association of Zoos and Aquariums (WAZA).  
210 Responses to our questionnaire were received from 5 zoos and aquariums as well as two private entities  
211 (see Acknowledgments).

### 212 Experimental fish and sampling

213 Sub adult *Amphiprion percula* (total length,  $45.2 \pm 1.2$  mm; Wt,  $1.6 \pm 0.1$  g,  $n=12$ ), *Amphiprion clarkii* (total  
214 length,  $46.4 \pm 5.1$  mm; Wt,  $2.3 \pm 0.9$  g,  $n=12$ ) and *Chromis viridis* (total length,  $43.0 \pm 1.6$  mm; Wt,  $1.3 \pm 0.1$  g,  
215  $n=12$ ), were used. Animals were acquired from local dealers and subjected to acclimation during one  
216 month in the facilities of the Marine Aquarium at the University of Murcia (Spain). Fish were kept in  
217 groups under exactly the same conditions (temperature,  $27 \pm 1$  °C; salinity,  $24 \pm 1$ , pH,  $8 \pm 0.2$ ; dissolved  
218 oxygen,  $6.5 \pm 0.2$  mg/L) and fed *ad libitum* four times a day a standard low-fat diet to match their  
219 requirements (composed by Mysis shrimp, enriched *Artemia nauplii* and red plankton).  
220 Fish were euthanized by exposure to the anesthetic benzocaine hydrochloride (400 mg l<sup>-1</sup>) for 10 min  
221 following the cessation of opercular movement. Brains, livers and samples of skeletal muscle were

222 collected for analyses. For each species, three whole brains were frozen in l-N and stored at -80 °C prior  
223 to molecular determinations.

224 The animal procedures were approved by responsible authorities (A13160603, from the Consejería de  
225 Agua, Agricultura, Ganadería y Pesca, Comunidad Autónoma de la Región de Murcia, Spain).

## 226 Coding sequence data

227 Our analysis comprised five clownfish species (*A. ocellaris*, *A. clarkii*, *A. bicinctus*, *A. percula*, *A. sebae*), *C.*  
228 *viridis* representing the non-symbiotic sister-taxon of the *Amphiprion* genus and nine more distantly  
229 related outgroup species (*Stegastes partitus*, *Pundamilia nyererei*, *Maylandia zebra*, *Oryzias latipes*,  
230 *Xiphophorus maculatus*, *Poecilia formosa*, *Fundulus heteroclitus*, *Nothobranchius furzeri*, *Aphyosemion*  
231 *striatum*). mRNA sequences of the outgroups were obtained from RefSeq along with their  
232 coding sequence annotation (Table S8). For *A. ocellaris*, *A. bicinctus*, *A. sebae* we downloaded read data  
233 from the short read archive (Bio projects PRJNA374650, PRJNA261388 and PRJNA285007, respectively).  
234 For *A. clarkii*, *A. percula* and *C. viridis* we performed novel RNA-seq as described in Table S9. The reads  
235 of the clownfishes and *C. viridis* were preprocessed using SeqPrep with minimum adapter length of five  
236 as well as a demanded minimum read length of 50. *De novo* transcriptome assemblies for these species  
237 were performed using FRAMA with *Stegastes partitus* as reference species (60). For the clownfishes and  
238 *C. viridis* the longest isoform was chosen to represent the gene. For the outgroups, in cases in which  
239 multiple isoforms per gene were annotated based on the reference, all of them were used in  
240 subsequent analyses. The assembly completeness of all examined species were estimated using BUSCO  
241 (61), was 90-100% (Table S8).

## 242 Identification of positively selected genes

243 To scan on a genome-wide scale for genes under positive selection, we fed the coding sequences of the  
244 described species set into the PosiGene pipeline (62). *Stegastes partitus* was used as PosiGene's anchor

245 species. Orthology was determined by PosiGene via best bidirectional BLAST searches (63, 64) against  
246 *Stegastes partitus*. The branch of the last common ancestor of the clownfishes was tested for genes  
247 under positive selection (Table S2). FDR <0.05 was used as threshold for significance.

## 248 Gene ontologies

249 We determined enrichments for GO categories using Fisher's exact test based on the R package GStats  
250 (Table S3). The resulting p-values were corrected using the Benjamini-Hochberg method (65). We used  
251 throughout the manuscript 0.1 as significance threshold. Enrichment for mitochondrial biogenesis genes  
252 was tested using Fisher's exact test and the union set of the genes in the following five mitochondrial  
253 related GO terms: GO:0000959, 0032543, 0045333, 0033108, 0070584 (Table S5). The same GO terms  
254 were used in our previous study (15) to test for enrichment

## 255 Meta analysis

256 To identify genes that show signs of positive selection across multiple evolutionary branches on which  
257 lifespan was altered considerably, we combined p-values from this study with those of two previous  
258 studies using Fisher's method (66) (Table S4-S6). In all three studies, PosiGene was used to determine p-  
259 values. The first study searched for genes under positive selection on 11 rodent branches on which the  
260 lifespan was presumably extended – most of them in the clade of the African mole-rat family that covers  
261 the longest-lived known rodents (67). The second study examined three branches of the *Nothobranchius*  
262 genus on which lifespan was presumably reduced (15) – the genus covers the shortest-lived vertebrate  
263 species that can be held in captivity (68).

## 264 Protein homology modeling

265 Homology modelling of the clownfish GSTK1 was carried out with SWISS-MODEL  
266 (<http://swissmodel.expasy.org>; (69, 70) using the crystal structures of the dimeric apoform of the human

267 mitochondrial GSTK1 (PDB 3rpp; (56)) and the substrate bound dimer of the rat enzyme PDB 1r4w; (57)).  
268 No further optimization was applied to the resulting models. Visualisation, superimposition of the  
269 respective crystal structures and the models as well as rendering was carried out using CHIMERA (71).

## 270 **Competing interests**

271 We have no competing interests.

## 272 **Author contributions**

273 AS performed the positive selection analysis and wrote the first draft of the paper, PAP performed the  
274 clownfish acclimatation and sampling, MB performed the transcriptome assemblies, MM performed the  
275 clownfish survey and helped in writing the paper, ALS performed the clownfish acclimatation and  
276 sampling, JdCR performed the clownfish acclimatation and sampling, MG performed the protein  
277 homology modelling, AC conceived and supervised the study, wrote the first draft of the paper. All  
278 authors have read and improved the first draft of the paper.

279

## 280 **Acknowledgments**

281 We thank the following individuals at zoos or aquariums for responding to our questionnaire: Vicky  
282 Béduneau (Océarium du Croisic, Le Croisic, France), Nicolas Hirel (Aquarium Mare Nostrum, Montpellier,  
283 France), Thomas Ziegler (Koelner Zoo, Köln, Germany), Nikolaj Meyer (Skansen-Akvariet, Stockholm,  
284 Sweden), Markus Dernjatin (Sea Life Helsinki, Helsinki, Finland). Personal communications on clownfish  
285 longevity were received also from Prof. Ike Olivotto (University of Ancona) and Prof. Hellen Thaler  
286 (Innsbruck). We thank Cornelia Luge, Ivonne Görlich and Marco Groth (CF DNA sequencing at Leibniz

287 Institute on Aging - Fritz Lipmann Institute) for conducting Illumina sequencing. We thank Matthias  
288 Platzer and Steve Hoffmann for helpful discussions and support.

289 **Figures**

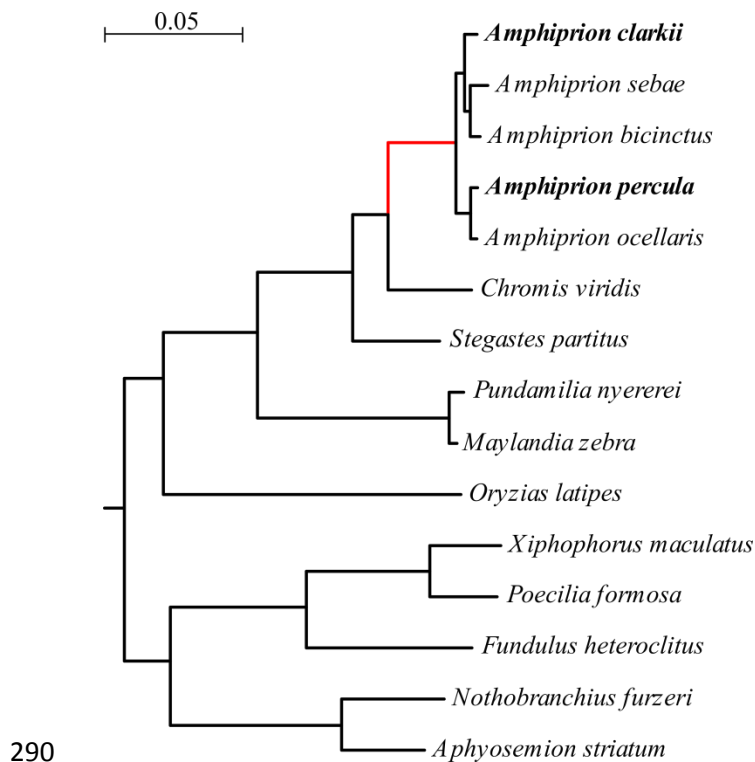

291 **Fig. 1.** Nucleotide-based phylogeny of the analyzed fish species. We searched for positively selected  
292 genes on the last common ancestor of the clownfishes (*Amphiprion*, red). The two species *A. clarkii* and  
293 *A. percula* depicted in bold are those that were sequenced in this study. The phylogenetic tree was  
294 derived as part of the positive selection analysis with the PosiGene pipeline (62). Briefly, during this  
295 process 8215 genes were concatenated and the resulting concatenated alignment split in 404 fragments  
296 each of which had a length of 15 knt. From each fragment, a phylogeny was calculated via maximum  
297 likelihood and, from all resulting 404 trees, a consensus tree was determined using the Phylip package  
298 (72). The scale bar represents 0.05 substitutions per site.

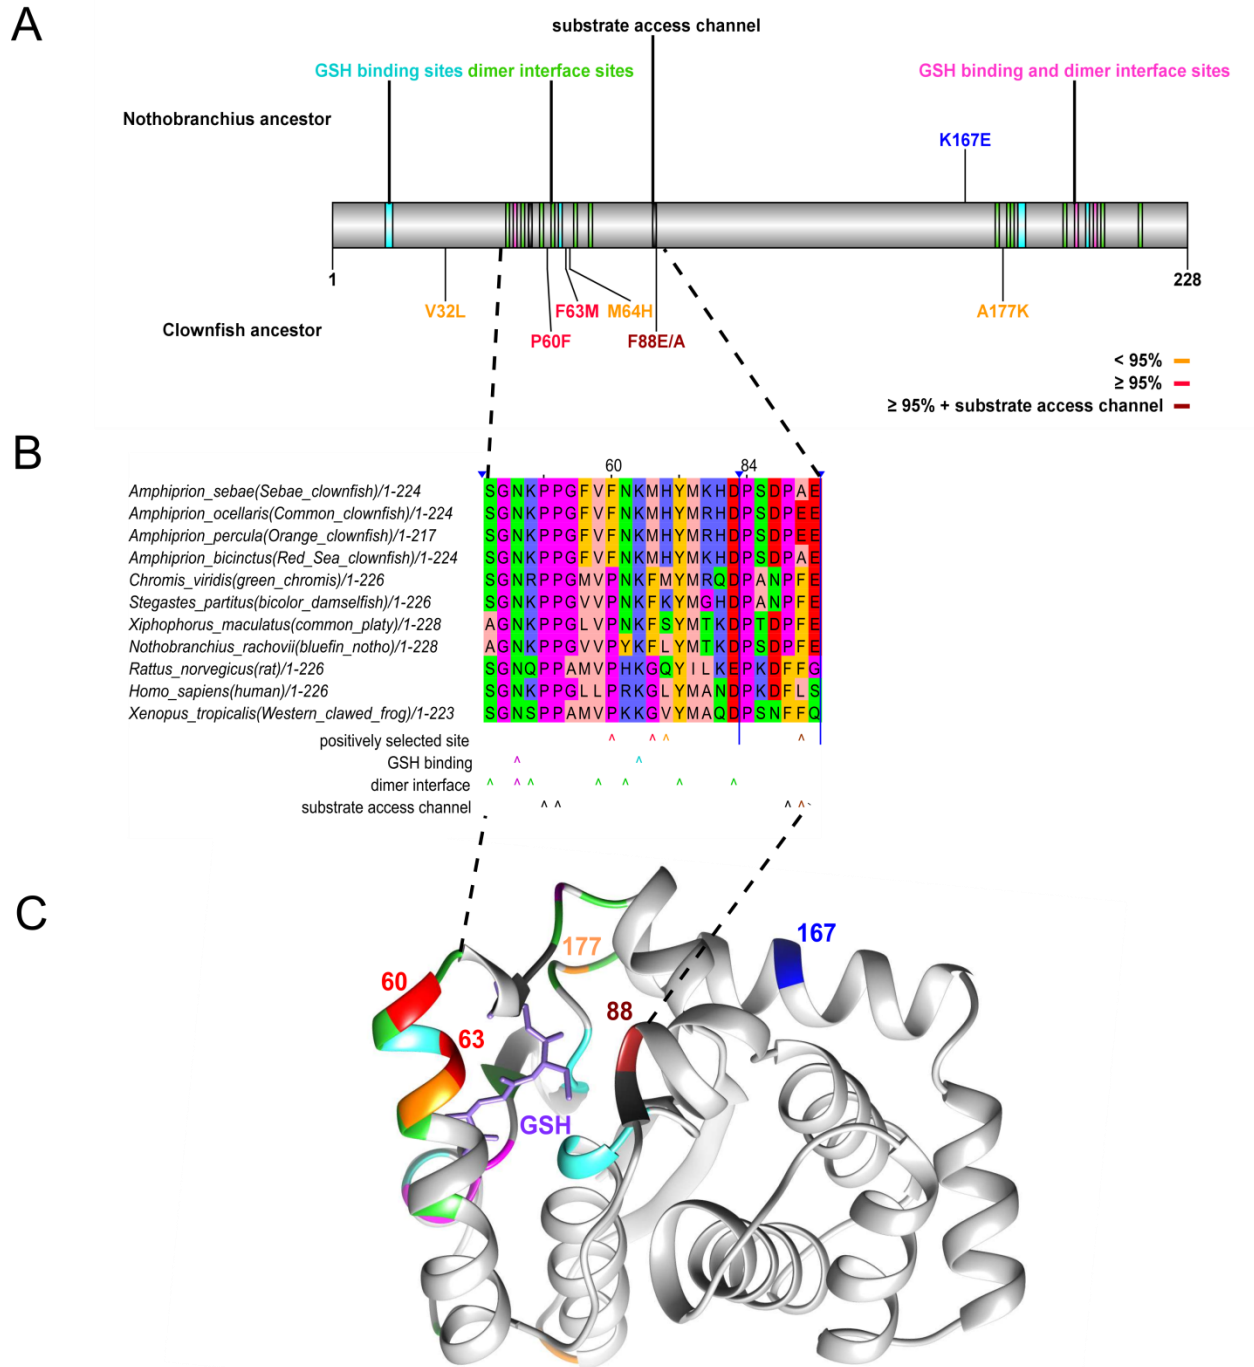

299

300

301 **Fig. 2. (A)** Linear depiction of GSTK1 with color coded known functional domains/sites (dimer interface –

302 green, GSH binding – turquoise, sites that serve as both dimer interface and GSH binding – violet,



303 substrate access channel – black) and positively selected sites (in the last common ancestor of the  
304 clownfishes with a predicted probability  $\geq 95\%$  – red, in the last common ancestor of the clownfishes  
305 with a predicted probability  $< 95\%$  – orange, in the last common ancestor of *Nothobranchius pienaari*  
306 and *Nothobranchius rachovii* – blue. (B) Alignment of GSTK1 orthologs across a wide phylogenetic range  
307 of species. Depicted are two protein regions (51-69, 84-89) that contain positively selected sites and  
308 functionally relevant sites in close proximity. The color code for positively selected and functionally  
309 relevant sites is the same as in panel A. (C) Clownfish GSTK1 model showing one subunit of the modelled  
310 dimer (for an overview see SI Fig S1. Selected positions are color coded according function depicted in  
311 the overview scheme at the top. The numbered and colored residue positions (60, 68, 88, 170 and 177)  
312 are discussed in detail in the text. Also shown is the GSH substrate (glutathione, light purple) as  
313 positioned in the template structure (PDB 1R4W) of the rat GSTK1.

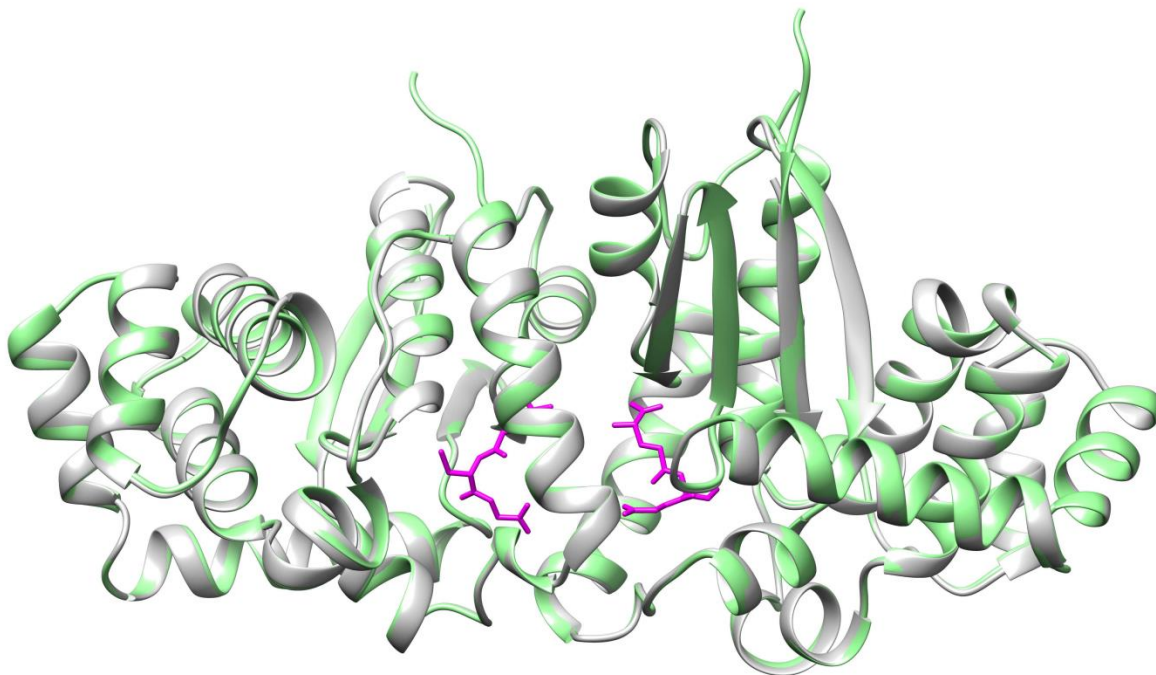

314

315 **Supplement Fig. S1.** Homology modelling of Clonfish GSTK1. Ribbon representation of the model

316 dimer for the clownfish enzyme as derived from SWISS-MODEL in grey, superimposed onto the dimeric

317 structure of the substrate bound rat GSTK1 (PDB 1r4w; (57)) used as template in light green. The  
318 pairwise r.m.s.d. for the C $\alpha$  positions between the model and 1r4w amounts to 0.52 Å as determined  
319 with the CHIMERA Matchmaker tool. The GSH substrate in the rat enzyme structure is rendered in light  
320 purple.

## 321 [Supplement](#)

### 322 [Supplement tables](#)

323 **Table S1.** Clownfish lifespan questionnaire results.

324 **Table S2.** PosiGene results for positively selected genes on the phylogenetic branch representing the last  
325 common ancestor of the the clownfishes (genus *Amphiprion*).

326 **Table S3.** Enrichment test results of biological gene ontology processes enriched for positively selected  
327 genes.

328 **Table S4.** Meta analysis using Fisher's method of positive selection across three analyses of phylogenetic  
329 branches on which lifespan changed considerably.

330 **Table S5.** Meta analysis using Fisher's method of positive selection across three phylogenetic branches  
331 of the *Nothobranchius* genus on which lifespan was reduced considerably.

332 **Table S6.** Meta analysis using Fisher's method of positive selection across eleven phylogenetic rodent  
333 branches on which lifespan was reduced considerably.

334 **Table S7.** Genes that were regarded as mitochondrial biogenesis related from five gene ontology terms.

335 **Table S8.** Assembly and sequence statistics.

336 **Table S9.** Samples that were sequenced to create genome/transcriptome assemblies.

## 337 Supplement data

338 available at:

339 [ftp://genome.leibniz-fli.de/pub/user/arne.sahm/clownfish/supplement\\_data.tar.gz](ftp://genome.leibniz-fli.de/pub/user/arne.sahm/clownfish/supplement_data.tar.gz)

340 The package contains assembled sequence data, visualizations of alignments and positively selected  
341 sites for all genes that were analyzed in this article.

## 342 References

- 343 1. Vrtilik M, Zak J, Polacik M, Blazek R, Reichard M. Longitudinal demographic study of wild  
344 populations of African annual killifish. *Sci Rep.* 2018;8(1):4774.
- 345 2. Nielsen J, Hedeholm RB, Heinemeier J, Bushnell PG, Christiansen JS, Olsen J, et al. Eye lens  
346 radiocarbon reveals centuries of longevity in the Greenland shark (*Somniosus microcephalus*). *Science.*  
347 2016;353(6300):702-4.
- 348 3. Finch TM, Zhao N, Korkin D, Frederick KH, Eggert LS. Evidence of positive selection in  
349 mitochondrial complexes I and V of the African elephant. *PLoS One.* 2014;9(4):e92587.
- 350 4. Seim I, Fang X, Xiong Z, Lobanov AV, Huang Z, Ma S, et al. Genome analysis reveals insights into  
351 physiology and longevity of the Brandt's bat *Myotis brandtii*. *Nat Commun.* 2013;4:2212.
- 352 5. Keane M, Semeiks J, Webb AE, Li YI, Quesada V, Craig T, et al. Insights into the evolution of  
353 longevity from the bowhead whale genome. *Cell Rep.* 2015;10(1):112-22.
- 354 6. Kim EB, Fang X, Fushan AA, Huang Z, Lobanov AV, Han L, et al. Genome sequencing reveals  
355 insights into physiology and longevity of the naked mole rat. *Nature.* 2011;479(7372):223-7.
- 356 7. Fang X, Nevo E, Han L, Levanon EY, Zhao J, Avivi A, et al. Genome-wide adaptive complexes to  
357 underground stresses in blind mole rats *Spalax*. *Nat Commun.* 2014;5:3966.
- 358 8. Sahm A, Bens M, Szafranski K, Holtze S, Groth M, Gorchach M, et al. Long-lived rodents reveal  
359 signatures of positive selection in genes associated with lifespan. *PLoS Genet.* 2018;14(3):e1007272.
- 360 9. Hossie TJ, Hassall C, Knee W, Sherratt TN. Species with a chemical defence, but not chemical  
361 offence, live longer. *J Evol Biol.* 2013;26(7):1598-602.
- 362 10. Blanco MA, Sherman PW. Maximum longevity of chemically protected and non-protected  
363 fishes, reptiles, and amphibians support evolutionary hypotheses of aging. *Mech Ageing Dev.*  
364 2005;126(6-7):794-803.
- 365 11. Shattuck MR, Williams SA. Arboreality has allowed for the evolution of increased longevity in  
366 mammals. *Proc Natl Acad Sci U S A.* 2010;107(10):4635-9.
- 367 12. Tozzini ET, Dorn A, Ng'oma E, Polacik M, Blazek R, Reichwald K, et al. Parallel evolution of  
368 senescence in annual fishes in response to extrinsic mortality. *BMC Evol Biol.* 2013;13:77.
- 369 13. Blazek R, Polacik M, Kacer P, Cellerino A, Rezuca R, Methling C, et al. Repeated intraspecific  
370 divergence in life span and aging of African annual fishes along an aridity gradient. *Evolution.*  
371 2017;71(2):386-402.
- 372 14. Cellerino A, Valenzano DR, Reichard M. From the bush to the bench: the annual *Nothobranchius*  
373 fishes as a new model system in biology. *Biol Rev Camb Philos Soc.* 2016;91(2):511-33.

- 374 15. Sahm A, Bens M, Platzer M, Cellerino A. Parallel evolution of genes controlling mitonuclear  
375 balance in short-lived annual fishes. *Aging Cell*. 2017;16(3):488-96.
- 376 16. Litsios G, Sims CA, Wuest RO, Pearman PB, Zimmermann NE, Salamin N. Mutualism with sea  
377 anemones triggered the adaptive radiation of clownfishes. *BMC Evol Biol*. 2012;12:212.
- 378 17. Fautin DG, Allen GR. *Field Guide to Anemonefishes and Their Host Sea Anemones*. . Perth:  
379 Western Australia Museum. 1992.
- 380 18. Elliott JK, Mariscal RN. Ontogenetic and interspecific variation in the protection of  
381 anemonefishes from sea anemones. *J Exp Mar Biol Ecol*. 1997;208(1):57-72.
- 382 19. Ollerton J, McCollin D, Fautin DG, Allen GR. Finding NEMO: nestedness engendered by  
383 mutualistic organization in anemonefish and their hosts. *Proc Biol Sci*. 2007;274(1609):591-8.
- 384 20. Buston PM. Mortality is associated with social rank in the clown anemonefish (*Amphiprion*  
385 *percula*). *Marine Biology* 2003;143:811-5.
- 386 21. Elliott JK, Elliott JM, Mariscal RN. Host selection, location, and association behaviors of  
387 anemonefishes in field settlement experiments. . *Marine Biology* 1995;122(3):377-89.
- 388 22. Mariscal RN. The nature of the symbiosis between Indo-Pacific anemone fishes and sea  
389 anemones. . *Mar Biol* 1970;6(1):58-65.
- 390 23. Buston PM, García MB. An extraordinary life span estimate for the clown anemonefish  
391 *Amphiprion percula*. *Journal of Fish Biology*. 2007;70(6):1710-9.
- 392 24. Aldenhoven JM. Local variation in mortality rates and life-expectancy estimates of the coral reef  
393 fish *Centropyge bicolor* (Pisces: Pomacanthidae). . *Marine Biology* 1986;92:237-44.
- 394 25. Eckert GJ. Estimates of adult and juvenile mortality for labrid fishes at One Tree Reef, Great  
395 Barrier Reef. . *Marine Biology* 1987;95:161-71.
- 396 26. Munro JL, Williams DM. Assessment and management of coral reef fisheries: biological,  
397 environmental, and socioeconomic aspects. In *Proceedings of the 5th International Coral Reef Congress*.  
398 1985;4:545-81.
- 399 27. Maison KA, Graham KS. Status review report: orange clownfish (*Amphiprion percula*). . Pacific  
400 Islands Fisheries Science Center, National Marine Fisheries Service, National Oceanic and Atmospheric  
401 Administration, US Department of Commerce. 2016.
- 402 28. Salles OC, Maynard JA, Joannides M, Barbu CM, Saenz-Agudelo P, Almany GR, et al. Coral reef  
403 fish populations can persist without immigration. *Proc Biol Sci*. 2015;282(1819).
- 404 29. Sahm A, Platzer M, Cellerino A. Outgroups and Positive Selection: The *Nothobranchius furzeri*  
405 Case. *Trends Genet*. 2016;32(9):523-5.
- 406 30. Garcia-Herrera N, Ferse SCA, Kunzmann A, Genin A. Mutualistic damselfish induce higher  
407 photosynthetic rates in their host coral. *The Journal of Experimental Biology*. 2017;220(10):1803-11.
- 408 31. Holbrook SJ, Brooks AJ, Schmitt RJ, Stewart HL. Effects of sheltering fish on growth of their host  
409 corals. *Mar Biol*. 2008;155(5):521-30.
- 410 32. Sweatman H. The timing of settlement by larval *Dascyllus aruanus*: some consequences for  
411 larval habitat selection. . *Proc 5th Int Coral Reef Conf* 5. 1985:367-72.
- 412 33. Liberman T, Genin A, Loya Y. Effects on growth and reproduction of the coral *Stylophora*  
413 *pistillata* by the mutualistic damselfish *Dascyllus marginatus*. *Mar Biol*. 1995;121:741-6.
- 414 34. Ben-Tzvi IO, Abelson A, Polak O, Kiflawi M. Habitat selection and the colonization of new  
415 territories by *Chromis viridis*. *Journal of Fish Biology*. 2008;73(4):1005-18.
- 416 35. Lecchini D, Nakamura Y, Grignon J, Tsuchiya M. Evidence of density-independent mortality in a  
417 settling coral reef damselfish, *Chromis viridis*. *Ichthyological Research*. 2006;53(3):298-300.
- 418 36. Hixon MA, Carr MH. Synergistic Predation, Density Dependence, and Population Regulation in  
419 *Marine Fish*. *Science*. 1997;277(5328):946-9.
- 420 37. Moyer JT. Longevity of the Anemonefish *Amphiprion clarkii* at Miyake-Jima, Japan with Notes on  
421 Four Other Species *Copeia*. 1986;1986:135-9.

- 422 38. McElwee JJ, Schuster E, Blanc E, Piper MD, Thomas JH, Patel DS, et al. Evolutionary conservation  
423 of regulated longevity assurance mechanisms. *Genome Biol.* 2007;8(7):R132.
- 424 39. Swindell WR. Gene expression profiling of long-lived dwarf mice: longevity-associated genes and  
425 relationships with diet, gender and aging. *BMC Genomics.* 2007;8:353.
- 426 40. Amador-Noguez D, Dean A, Huang W, Setchell K, Moore D, Darlington G. Alterations in  
427 xenobiotic metabolism in the long-lived Little mice. *Aging Cell.* 2007;6(4):453-70.
- 428 41. Steinbaugh MJ, Sun LY, Bartke A, Miller RA. Activation of genes involved in xenobiotic  
429 metabolism is a shared signature of mouse models with extended lifespan. *Am J Physiol Endocrinol*  
430 *Metab.* 2012;303(4):E488-95.
- 431 42. Houtkooper RH, Mouchiroud L, Ryu D, Moullan N, Katsyuba E, Knott G, et al. Mitonuclear  
432 protein imbalance as a conserved longevity mechanism. *Nature.* 2013;497(7450):451-7.
- 433 43. Valenzano DR, Benayoun BA, Singh PP, Zhang E, Etter PD, Hu CK, et al. The African Turquoise  
434 Killifish Genome Provides Insights into Evolution and Genetic Architecture of Lifespan. *Cell.*  
435 2015;163(6):1539-54.
- 436 44. Sahm A, Cellerino A. (Anti-)parallel evolution of lifespan. *Aging (Albany NY).* 2017;9(10):2018-9.
- 437 45. Antonicka H, Shoubridge EA. Mitochondrial RNA Granules Are Centers for Posttranscriptional  
438 RNA Processing and Ribosome Biogenesis. *Cell Rep.* 2015.
- 439 46. Eskelinen EL. Roles of LAMP-1 and LAMP-2 in lysosome biogenesis and autophagy. *Mol Aspects*  
440 *Med.* 2006;27(5-6):495-502.
- 441 47. Berditchevski F, Odintsova E. Tetraspanins as regulators of protein trafficking. *Traffic.*  
442 2007;8(2):89-96.
- 443 48. Sordat I, Decraene C, Silvestre T, Petermann O, Auffray C, Pietu G, et al. Complementary DNA  
444 arrays identify CD63 tetraspanin and alpha3 integrin chain as differentially expressed in low and high  
445 metastatic human colon carcinoma cells. *Lab Invest.* 2002;82(12):1715-24.
- 446 49. Sauer G, Kurzeder C, Grundmann R, Kreienberg R, Zeillinger R, Deissler H. Expression of  
447 tetraspanin adaptor proteins below defined threshold values is associated with in vitro invasiveness of  
448 mammary carcinoma cells. *Oncol Rep.* 2003;10(2):405-10.
- 449 50. Zhijun X, Shulan Z, Zhuo Z. Expression and significance of the protein and mRNA of metastasis  
450 suppressor gene ME491/CD63 and integrin alpha5 in ovarian cancer tissues. *Eur J Gynaecol Oncol.*  
451 2007;28(3):179-83.
- 452 51. Kwon MS, Shin SH, Yim SH, Lee KY, Kang HM, Kim TM, et al. CD63 as a biomarker for predicting  
453 the clinical outcomes in adenocarcinoma of lung. *Lung Cancer.* 2007;57(1):46-53.
- 454 52. Lai X, Gu Q, Zhou X, Feng W, Lin X, He Y, et al. Decreased expression of CD63 tetraspanin protein  
455 predicts elevated malignant potential in human esophageal cancer. *Oncol Lett.* 2017;13(6):4245-51.
- 456 53. Zhang C, Cuervo AM. Restoration of chaperone-mediated autophagy in aging liver improves  
457 cellular maintenance and hepatic function. *Nat Med.* 2008;14(9):959-65.
- 458 54. Gao F, Fang Q, Zhang R, Lu J, Lu H, Wang C, et al. Polymorphism of DsbA-L gene associates with  
459 insulin secretion and body fat distribution in Chinese population. *Endocr J.* 2009;56(3):487-94.
- 460 55. Sharma M, Gupta S, Singh K, Mehndiratta M, Gautam A, Kalra OP, et al. Association of  
461 glutathione-S-transferase with patients of type 2 diabetes mellitus with and without nephropathy.  
462 *Diabetes Metab Syndr.* 2016;10(4):194-7.
- 463 56. Wang B, Peng Y, Zhang T, Ding J. Crystal structures and kinetic studies of human Kappa class  
464 glutathione transferase provide insights into the catalytic mechanism. *Biochem J.* 2011;439(2):215-25.
- 465 57. Ladner JE, Parsons JF, Rife CL, Gilliland GL, Armstrong RN. Parallel evolutionary pathways for  
466 glutathione transferases: structure and mechanism of the mitochondrial class kappa enzyme rGSTK1-1.  
467 *Biochemistry.* 2004;43(2):352-61.

- 468 58. Aramillo Irizar P, Schauble S, Esser D, Groth M, Frahm C, Priebe S, et al. Transcriptomic  
469 alterations during ageing reflect the shift from cancer to degenerative diseases in the elderly. *Nat*  
470 *Commun.* 2018;9(1):327.
- 471 59. Kurz T, Terman A, Gustafsson B, Brunk UT. Lysosomes and oxidative stress in aging and  
472 apoptosis. *Biochim Biophys Acta.* 2008;1780(11):1291-303.
- 473 60. Bens M, Sahm A, Groth M, Jahn N, Morhart M, Holtze S, et al. FRAMA: from RNA-seq data to  
474 annotated mRNA assemblies. *BMC Genomics.* 2016;17:54.
- 475 61. Simao FA, Waterhouse RM, Ioannidis P, Kriventseva EV, Zdobnov EM. BUSCO: assessing genome  
476 assembly and annotation completeness with single-copy orthologs. *Bioinformatics.* 2015;31(19):3210-2.
- 477 62. Sahm A, Bens M, Platzer M, Szafranski K. PosiGene: automated and easy-to-use pipeline for  
478 genome-wide detection of positively selected genes. *Nucleic Acids Res.* 2017.
- 479 63. Overbeek R, Fonstein M, D'Souza M, Pusch GD, Maltsev N. The use of gene clusters to infer  
480 functional coupling. *Proc Natl Acad Sci U S A.* 1999;96(6):2896-901.
- 481 64. Camacho C, Coulouris G, Avagyan V, Ma N, Papadopoulos J, Bealer K, et al. BLAST+: architecture  
482 and applications. *BMC Bioinformatics.* 2009;10:421.
- 483 65. Benjamini Y, Y. H. Controlling the false discovery rate: A practical and powerful approach to  
484 multiple testing. *Journal of the Royal Statistical Society Series B (Methodological).* 1995;57(1):289-300.
- 485 66. Fisher RA. *Statistical Methods for Research Workers.* 1932.
- 486 67. Tacutu R, Craig T, Budovsky A, Wuttke D, Lehmann G, Taranukha D, et al. Human Ageing  
487 Genomic Resources: integrated databases and tools for the biology and genetics of ageing. *Nucleic Acids*  
488 *Res.* 2013;41(Database issue):D1027-33.
- 489 68. Valdesalici S, Cellerino A. Extremely short lifespan in the annual fish *Nothobranchius furzeri*.  
490 *Proc Biol Sci.* 2003;270 Suppl 2:S189-91.
- 491 69. Arnold K, Bordoli L, Kopp J, Schwede T. The SWISS-MODEL workspace: a web-based  
492 environment for protein structure homology modelling. *Bioinformatics.* 2006;22(2):195-201.
- 493 70. Biasini M, Bienert S, Waterhouse A, Arnold K, Studer G, Schmidt T, et al. SWISS-MODEL:  
494 modelling protein tertiary and quaternary structure using evolutionary information. *Nucleic Acids Res.*  
495 2014;42(Web Server issue):W252-8.
- 496 71. Pettersen EF, Goddard TD, Huang CC, Couch GS, Greenblatt DM, Meng EC, et al. UCSF Chimera--  
497 a visualization system for exploratory research and analysis. *J Comput Chem.* 2004;25(13):1605-12.
- 498 72. Felsenstein J. PHYLIP (Phylogeny Inference Package) version 3.6. Distributed by the author.  
499 2005; Department of Genome Sciences, University of Washington, Seattle.
